# Supplementary material for: One-pot synthesis of efficient multifunctional nitrogen-doped carbon dots with efficient yellow fluorescence emission for detection of hypochlorite and thiosulfate
Source: Royal Society of Chemistry journal article supplement (doi:10.1039/d2tb01695h), 2022-01-01
Supplement: d2tb01695h1.pdf [file d2tb01695h1.pdf]

## One-pot synthesis of efficient multifunctional nitrogen doping carbon dots with efficient yellow fluorescent emission for detection of hypochlorite and thiosulfate

Yifang Gao<sup>a</sup>, Yang Liu<sup>b</sup>, Huilin Zhang<sup>b</sup>, Wenjing Lu<sup>b</sup>, Yuan Jiao<sup>a\*</sup>,

Shaomin Shuang<sup>b</sup> and Chuan Dong<sup>b\*</sup>

### Experimental

#### Determination of QY

The quantum yield  $\Phi_S$  of the NCDs were determined by a comparative method as follows:

$$\Phi_S = \Phi_R (\text{Grad}_S / \text{Grad}_R) (\eta_S^2 / \eta_R^2)$$

where Grad is the gradient from the plot of integrated fluorescence intensity against absorbance and  $\eta$  (1.33 for water and 1.36 for ethanol) is the refractive index of the solvent. The subscripts S and R represent NCDs and the reference (rhodamine 6G in ethanol). To prevent the re-absorption effect, the absorbances of NCDs and quinine sulfate solutions in the 10-mm fluorescence cuvette were adjusted to less than 0.10 at the excitation wavelength ( $\lambda_{\text{ex}}$ ) of 380 nm (i.e., the absorption maximum of NCDs). The integrated fluorescence intensity was the area under the PL curve in the wavelength range 400–700 nm. The  $\Phi_R$  was taken as 0.95 since it is almost independent (within 5%) with  $\lambda_{\text{ex}}$  at 200–400 nm.

**Table S1.** Elemental analysis of the as-synthesised NCDs.

| Sample name | Elemental content (%) |     |      |                |
|-------------|-----------------------|-----|------|----------------|
|             | C                     | H   | N    | O (Calculated) |
| NCDs        | 30.7                  | 6.2 | 15.2 | 47.9           |

**Table S2.** Lifetime calculations from the time-resolved decay profiles of NCDs, NCDs-ClO<sup>-</sup> and NCDs-ClO<sup>-</sup>-S<sub>2</sub>O<sub>3</sub><sup>2-</sup>.

| Sample                                                             | $\tau_1$ (ns) | Percentage (%) | $\tau_2$ (ns) | Percentage (%) | Ave. $\tau$ (ns) |
|--------------------------------------------------------------------|---------------|----------------|---------------|----------------|------------------|
| NCDs                                                               | 4.3242        | 87.77          | 11.5887       | 12.23          | 5.21             |
| NCDs-ClO <sup>-</sup>                                              | 4.0247        | 82.16          | 9.3701        | 17.84          | 4.98             |
| NCDs-ClO <sup>-</sup> -S <sub>2</sub> O <sub>3</sub> <sup>2-</sup> | 4.2956        | 89.31          | 12.5201       | 10.69          | 5.17             |

**Table S3.** Comparison of detection limit between the proposed fluorescent sensor and other reported detection methods for ClO<sup>-</sup>.

| Sensing probe         | Response region            | Detection limits      | Reference |
|-----------------------|----------------------------|-----------------------|-----------|
| CDs–rhodamine B       | 10–140 $\mu\text{M}$       | 4 $\mu\text{M}$       | 1         |
| Graphene quantum dots | 0.5–1.0 $\mu\text{M}$      | 0.3 $\mu\text{M}$     | 2         |
| CDs                   | 5–200/2.5–50 $\mu\text{M}$ | 2.0/0.5 $\mu\text{M}$ | 3         |

|                     |                                 |                       |           |
|---------------------|---------------------------------|-----------------------|-----------|
| Ethanol-derived CDs | 0.1-2 $\mu\text{M}$             | 100 nM                | 4         |
| N-doped CDs         | 0.1–27 $\mu\text{M}$            | 0.0297 $\mu\text{M}$  | 5         |
| MF-CDs              | 0.6–20 $\mu\text{M}$            | 0.18 $\mu\text{M}$    | 6         |
| NCDs                | 0.067–19.33/24–98 $\mu\text{M}$ | 0.013 $\mu\text{M}$ . | This work |

**Table S4.** Comparison of detection limit between the proposed fluorescent sensor and other reported detection methods for PPI.

| Sensing probe            | Response region          | Detection limits   | Reference |
|--------------------------|--------------------------|--------------------|-----------|
| N-doped CDs              | 1-20/20–80 $\mu\text{M}$ | 1.17 $\mu\text{M}$ | 7         |
| C-dots/ $\text{Fe}^{3+}$ | /                        | 8.47 $\mu\text{M}$ | 8         |
| NCDs                     | 6.6-100 $\mu\text{M}$    | 0.78 $\mu\text{M}$ | This work |

**Table S5.** Application of the proposed fluorescence (FL) method for the determination of  $\text{ClO}^-$  in tap water sample spiked with different amounts of  $\text{ClO}^-$ .

| Sample | The FL method           |                         |              |            |
|--------|-------------------------|-------------------------|--------------|------------|
|        | Added ( $\mu\text{M}$ ) | Found ( $\mu\text{M}$ ) | Recovery (%) | R.S.D. (%) |
| 1      | 5                       | 4.86                    | 97.2         | 2.1        |
| 1      | 20                      | 20.2                    | 100.1        | 3.2        |
| 2      | 50                      | 48.8                    | 97.6         | 2.4        |
| 3      | 80                      | 80.1                    | 100.1        | 3.1        |

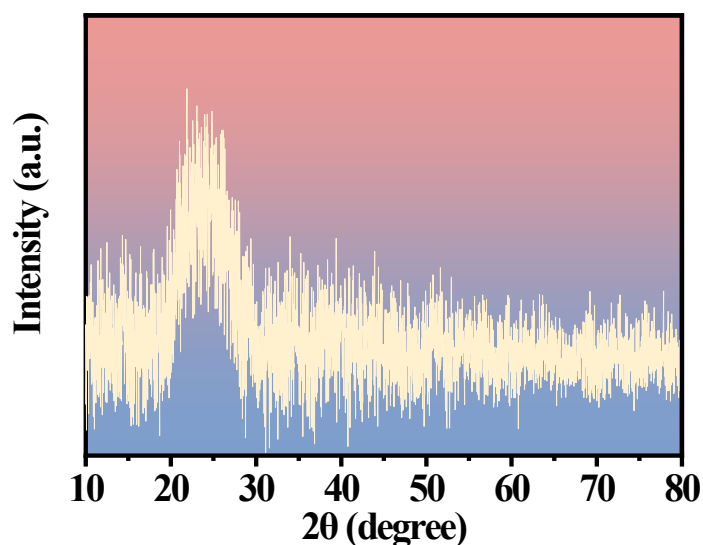

**Figure S1** X-ray diffraction (XRD) pattern of the NCDs.

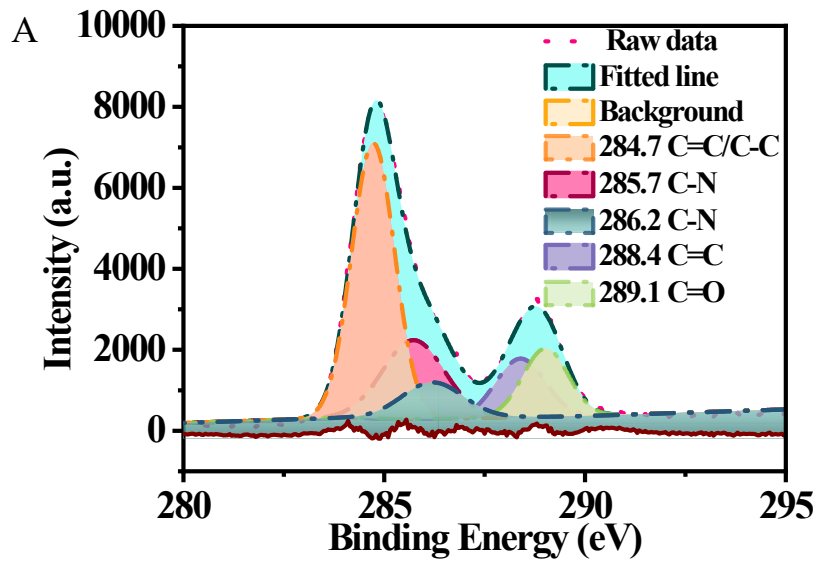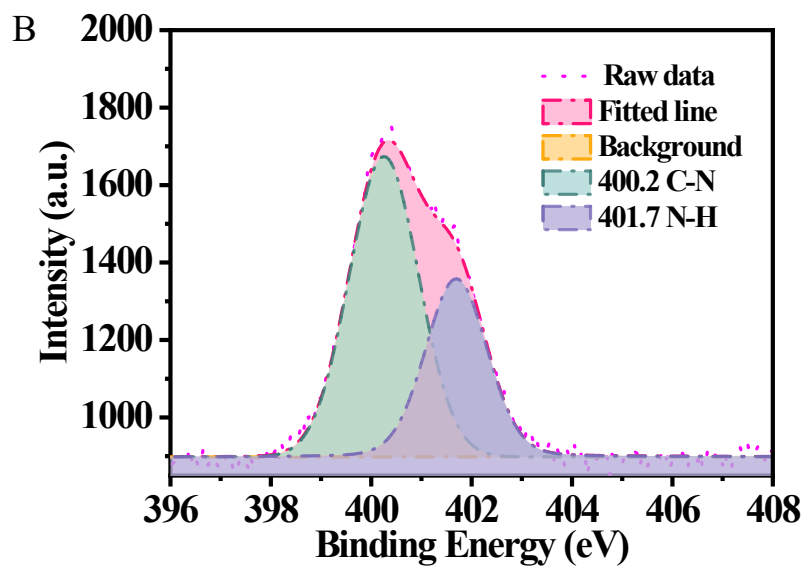

C

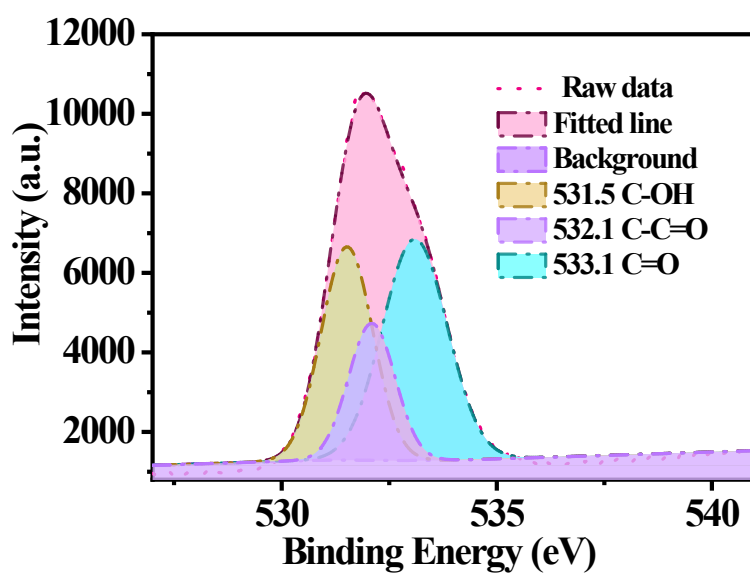

Figure S2 High-resolution XPS data of C 1s (A), N 1s (B) and O1s (C) of NCDs.

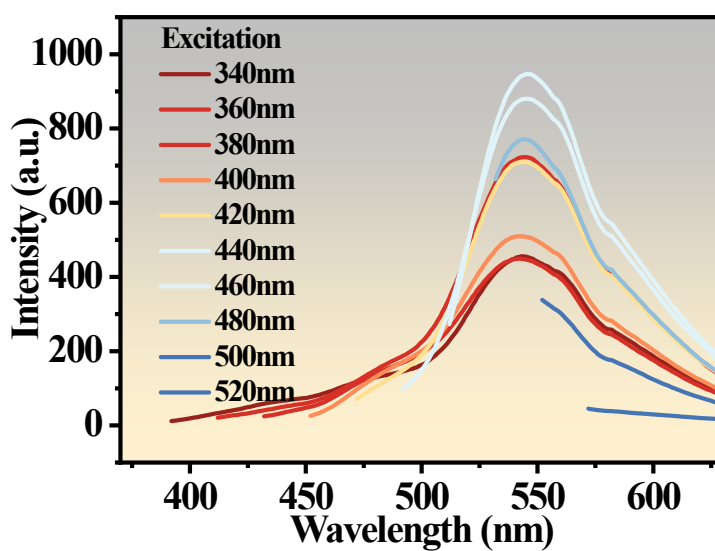

Figure S3 FL emission spectra of the NCDs under different excitation wavelengths.

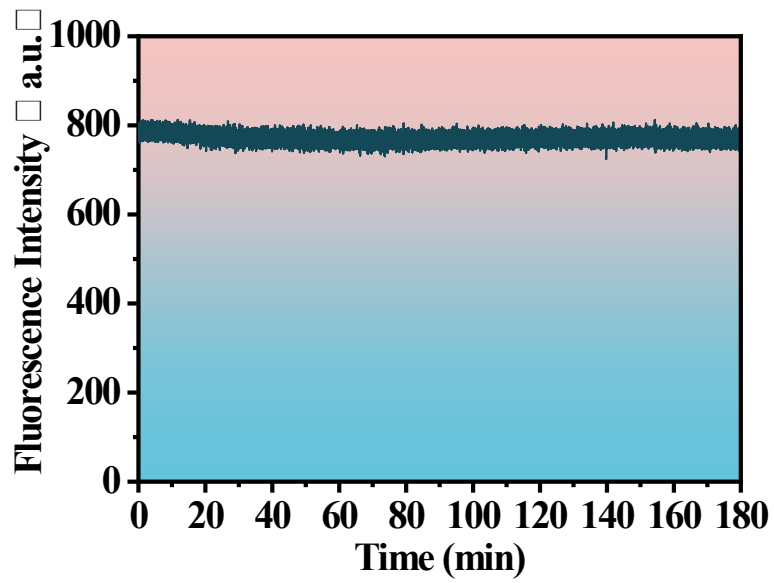

**Figure S4** Effect of time intervals of irradiation with xenon arc light on fluorescence intensity of NCDs.

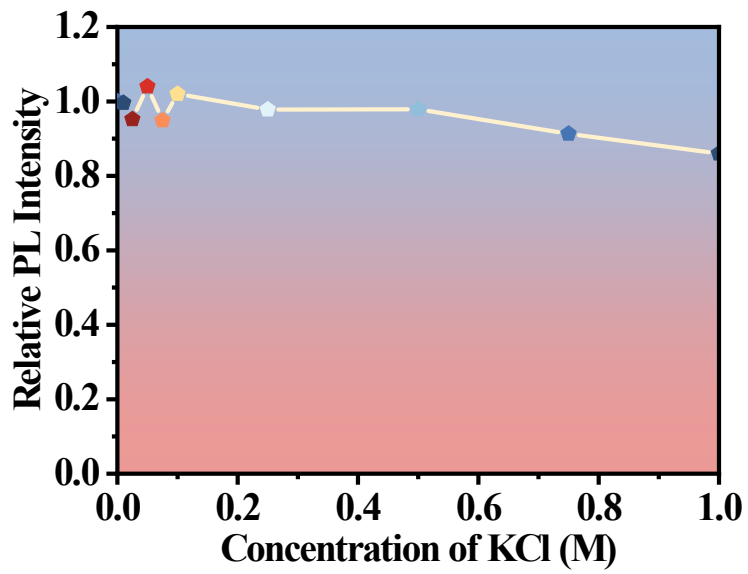

**Figure S5** Effect of ionic strength on fluorescence intensity of NCDs.

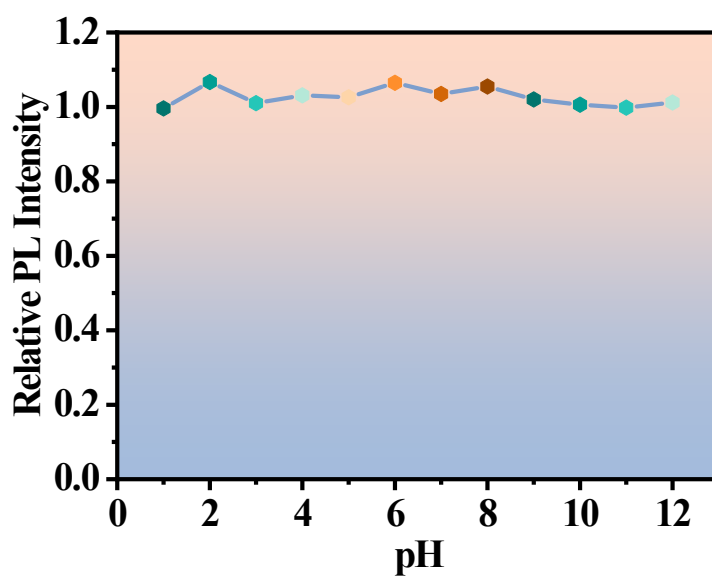

**Figure S6** Effect of pH on FL intensity of NCDs. The pH is adjusted by the PBS buffers.

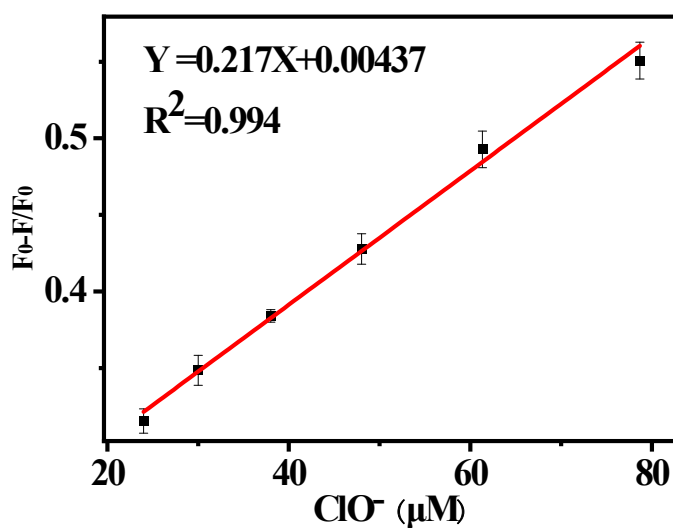

**Figure S7** A linear plot showing the relationship between the FL intensity and the concentrations of  $\text{ClO}^-$  ( $\lambda_{\text{ex}} = 378 \text{ nm}$ ).

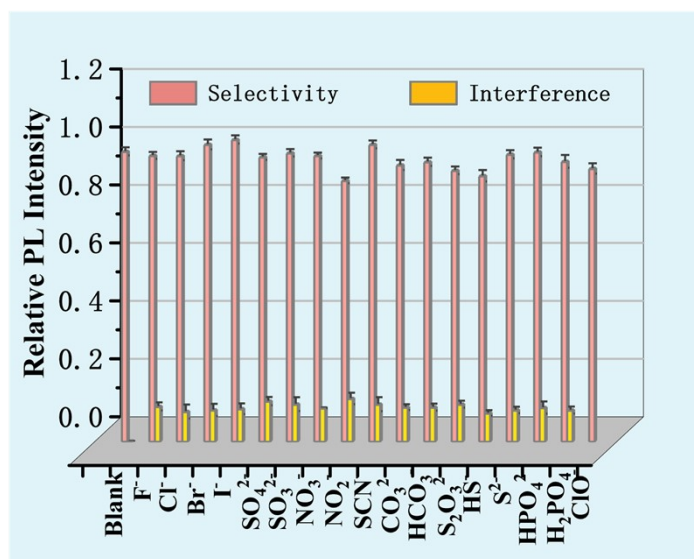

**Figure S8** The influence of different metal ions on the fluorescence of NCDs.

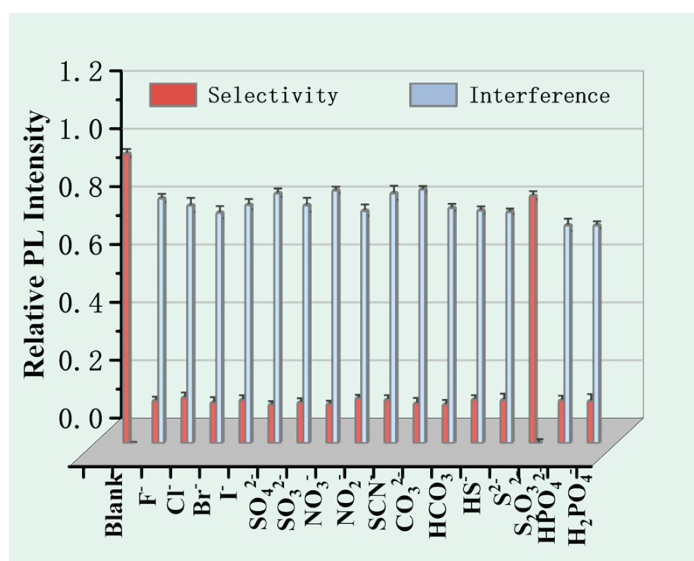

**Figure S9** The influence of different different anion on the fluorescence of NCDs-ClO<sup>-</sup>.

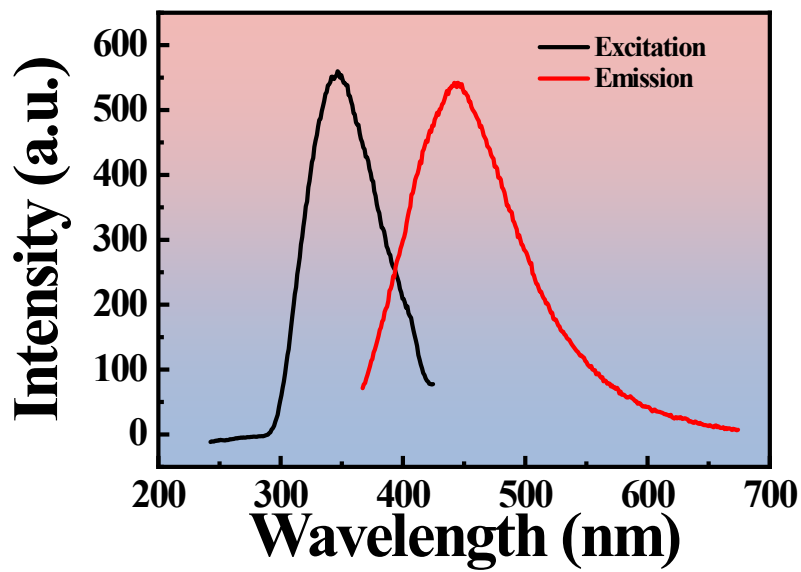

**Figure S10** The FL spectra of the NCDs synthesized from citric acid alone.

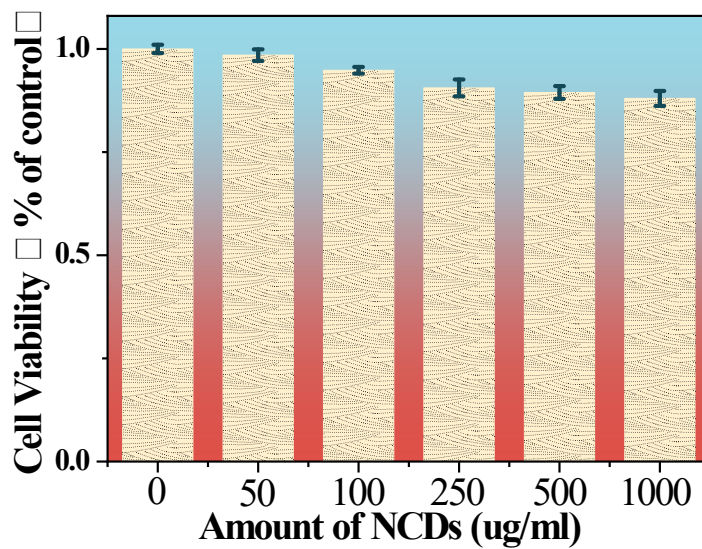

**Figure S11** Cytotoxicity testing results of NCDs on SMMC7721 cells viability. The values represent percentage cell viability (mean%  $\pm$  SD, n=6).



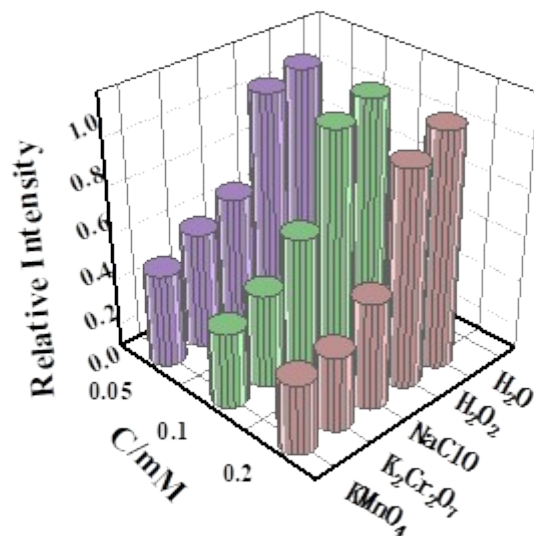

**Figure S12** Fluorescence response of 200  $\mu\text{g mL}^{-1}$  N-CDs in the presence of different oxidants ( $\text{H}_2\text{O}_2$ ,  $\text{NaClO}_3$ ,  $\text{KMnO}_4$  and  $\text{K}_2\text{Cr}_2\text{O}_7$ ).

1. Ding, Y.; Ling, J.; Cai, J.; Wang, S.; Li, X.; Yang, M.; Zha, L.; Yan, J., A carbon dot-based hybrid fluorescent sensor for detecting free chlorine in water medium. *Analytical Methods* **2016**, *8* (5), 1157-1161.
2. Hallaj, T.; Amjadi, M.; Manzoori, J. L.; Shokri, R., Chemiluminescence reaction of glucose-derived graphene quantum dots with hypochlorite, and its application to the determination of free chlorine. *Microchimica Acta* **2015**, *182* (3), 789-796.
3. Simões, E. F. C.; Leitão, J. M. M.; da Silva, J. C. G. E., Carbon dots prepared from citric acid and urea as fluorescent probes for hypochlorite and peroxyxynitrite. *Microchimica Acta* **2016**, *183* (5), 1769-1777.
4. Hu, Y.; Yang, J.; Jia, L.; Yu, J.-S., Ethanol in aqueous hydrogen peroxide solution: Hydrothermal synthesis of highly photoluminescent carbon dots as multifunctional nanosensors. *Carbon* **2015**, *93*, 999-1007.
5. Lin, Y.; Yao, B.; Huang, T.; Zhang, S.; Cao, X.; Weng, W., Selective determination of free dissolved chlorine using nitrogen-doped carbon dots as a fluorescent probe. *Microchimica Acta* **2016**, *183* (7), 2221-2227.
6. Zhan, Y.; Luo, F.; Guo, L.; Qiu, B.; Lin, Y.; Li, J.; Chen, G.; Lin, Z., Preparation of an Efficient Ratiometric Fluorescent Nanoprobe ( $m\text{-CDs@[Ru(bpy)}_3\text{]}^{2+}$ ) for Visual and Specific Detection of Hypochlorite on Site and in Living Cells. *ACS Sensors* **2017**, *2* (11), 1684-1691.
7. Wang, B.; Tan, H.; Zhang, T.; Duan, W.; Zhu, Y., Hydrothermal synthesis of N-doped carbon dots from an ethanolamine-ionic liquid gel to construct label-free multifunctional fluorescent probes for  $\text{Hg}^{2+}$ ,  $\text{Cu}^{2+}$  and  $\text{S}_2\text{O}_3^{2-}$ . *Analyst* **2019**, *144* (9), 3013-3022.
8. Dhenadhayalan, N.; Lin, K.-C., Chemically Induced Fluorescence Switching of Carbon-Dots and Its Multiple Logic Gate Implementation. *Scientific Reports* **2015**, *5* (1), 10012.
